# Supplementary material for: Sequential requirement of Sox4 and Sox11 during development of the sympathetic nervous system
Source: Oxford University Press journal article supplement (doi:10.1242/dev.042101), 2010-02-10
Supplement: dev042101supptables1.pdf [file dev042101supptables1.pdf]

Table S1. Temporal expression of *Sox4* and *Sox11* relative to sympathetic markers in the chick embryo

| Embryonic stage: | Somites |       |      |       |      |     | E4-10 |
|------------------|---------|-------|------|-------|------|-----|-------|
|                  | 30      | 31/32 | 33   | 34    | 35   | 36  |       |
| <b>Probe</b>     |         |       |      |       |      |     |       |
| <i>Phox2b</i>    | +       | +++   | +++  | ++++  | +++  | +++ | +     |
| <i>Hand2</i> *   | –       | –++   | –++  | ++++  | +++  | +++ | +     |
| <i>Gata2</i> *   | –       | ---   | –++  | ++++  | +++  | +++ | +     |
| <i>Sox4</i>      | –       | ---   | –w w | ++++  | w ++ | +++ | +     |
| <i>Sox11</i>     | –       | ---   | --w  | –w ++ | w ++ | +++ | +     |
| <i>Th</i>        | –       | ---   | ---  | ----  | --+  | +++ | +     |
| <i>Scg10</i>     | –       | ---   | ---  | ----  | --+  | +++ | +     |

All sections were examined by in situ hybridization and correspond to the wing bud region. Data from one embryo are listed in one row.

+, sections with strongly positive cells in sympathetic ganglia.

w, sections with weakly positive cells in sympathetic ganglia.

–, sections devoid of positive cells in sympathetic ganglia.

\*Data for *Hand2* and *Gata2* are derived from Tsarovina et al. (Tsarovina et al., 2004).
